# Supplementary material
Source: PubMed Central journal article supplement (PMC5546763)

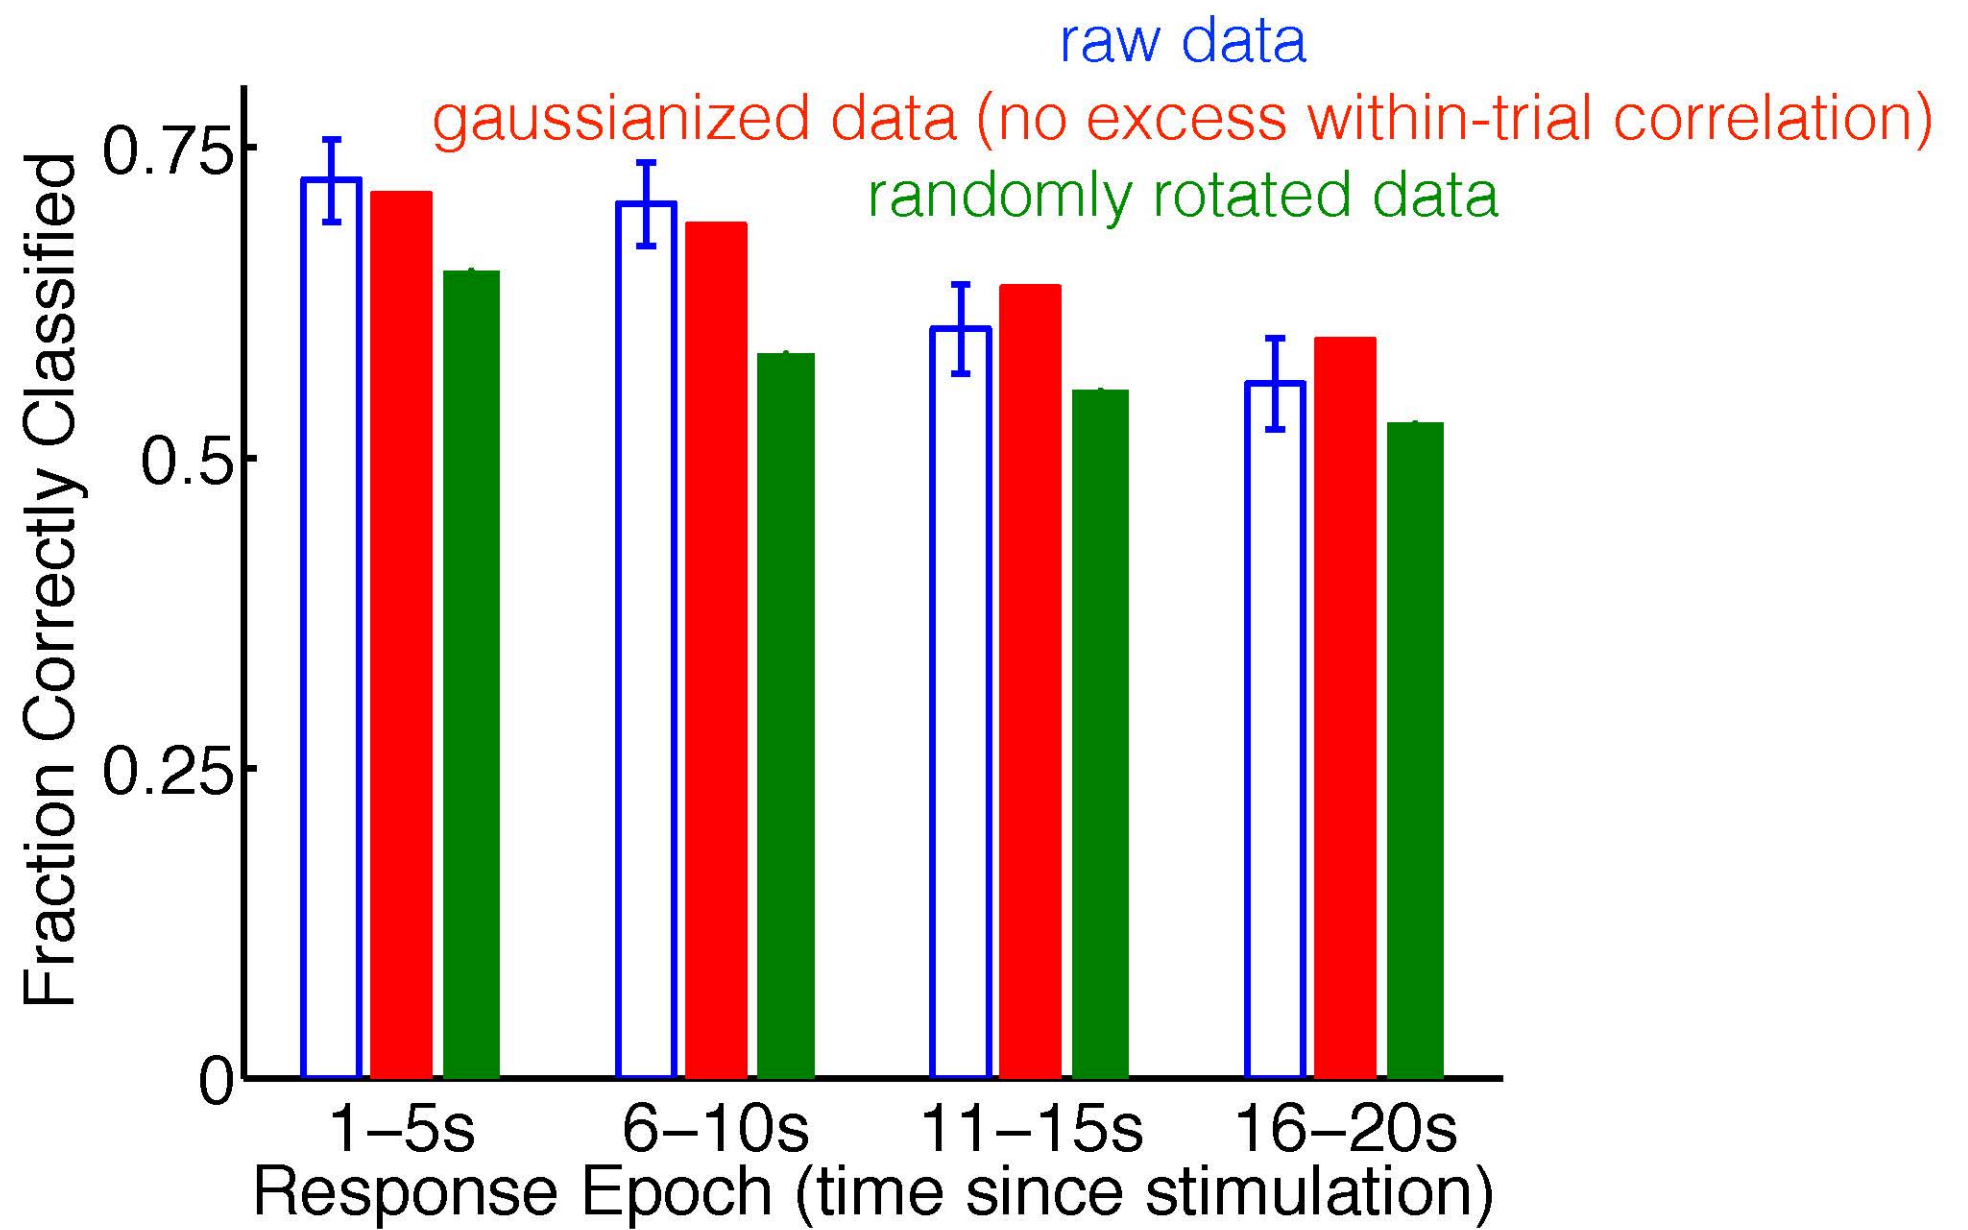

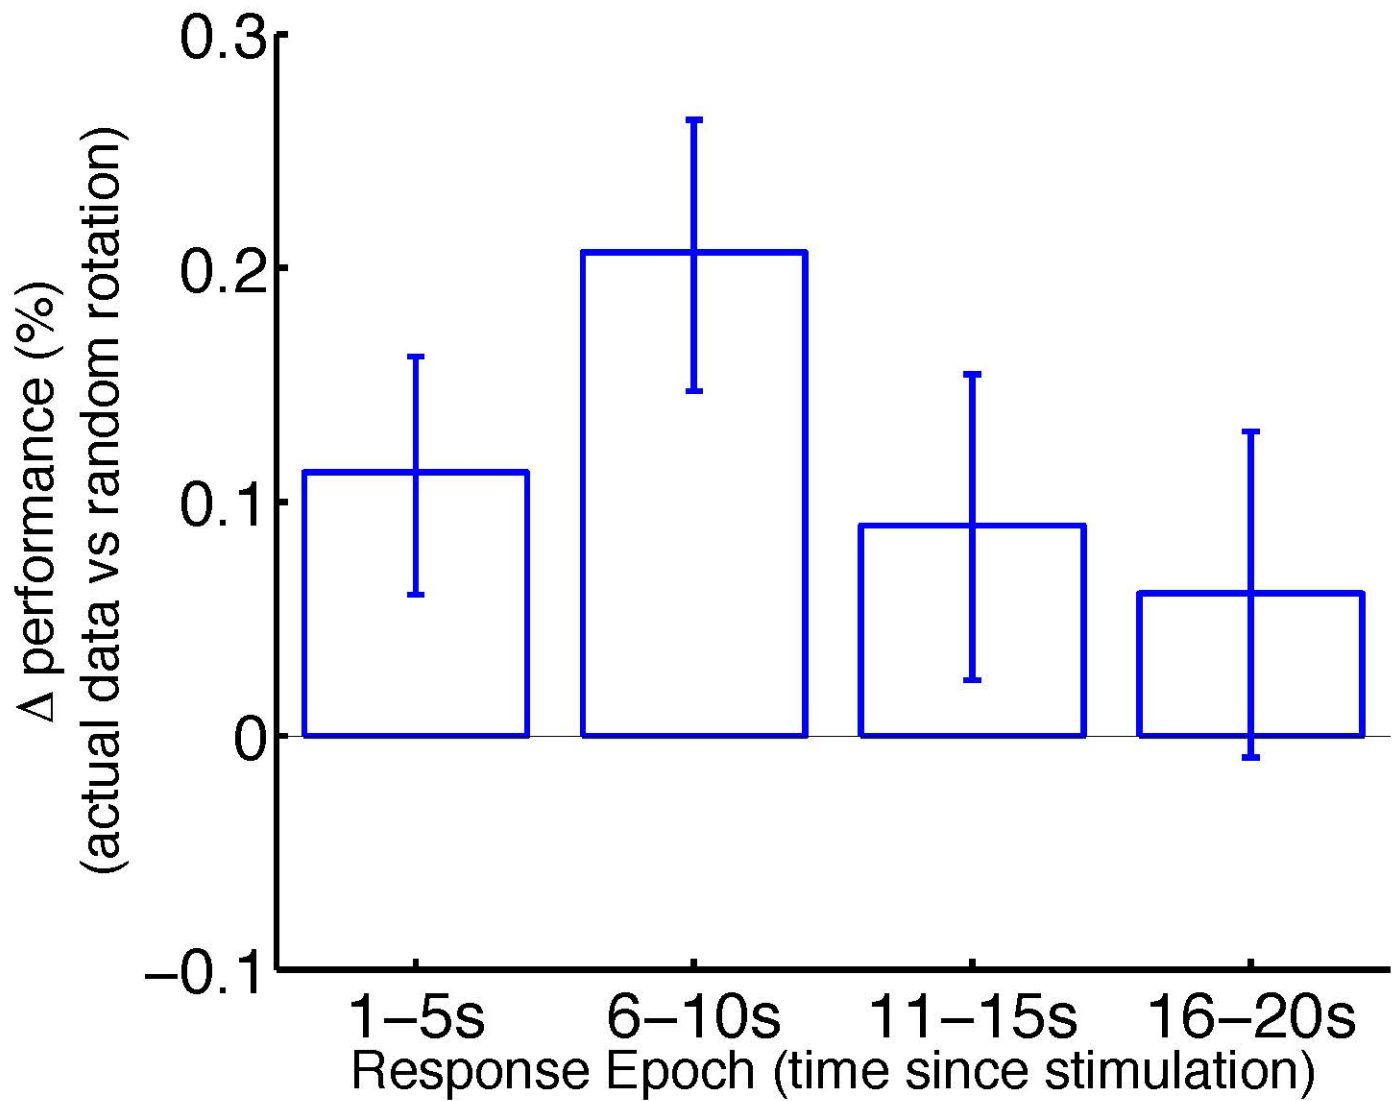

Supplement: NIHMS731861-supplement-Supp_FigureS1-S2.pdf [file NIHMS731861-supplement-Supp_FigureS1-S2.pdf]
